# Supplementary material for: Photochemical synthesis in inorganic chemistry
Source: publisher site journal article supplement (doi:10.1515/revic-2023-0023), 2024-02-16
Supplement: Supplementary file 1 [file j_revic-2023-0023_suppl_001.docx]

**Supporting information**

PHOTOCHEMICAL SYNTHESIS IN INORGANIC CHEMISTRY

Rimsha Kanwal1, Riyadh R. Al-Araji2, Ahmad H. Ibrahim4, Muhammad Adnan Iqbal1,3,*, Shamsa Bibi1, Adina Zafar1, Muhammad Yaseen5, Umer Shoukat1, Faisal Jamil1

1Department of Chemistry, University of Agriculture Faisalabad, Pakistan.

2College of Education for Pure Sciences, Wasit University, kut, Wasit, Iraq.

3Organometallic & Coordination Chemistry Laboratory, Department of Chemistry, University of Agriculture Faisalabad, Pakistan.

4Pharmacy Department, Faculty of Pharmacy, Tishk International University, 100 Mt. St, Near Baz intersection, Erbil, KRG, Iraq

5Department of Chemistry, Division of Science and Technology, University of Education, Lahore, Pakistan.


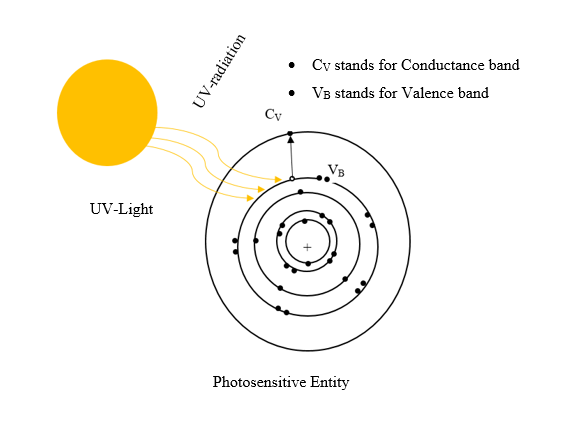


**Figure S1.** The transition of an electron by using UV light in order to activate the photosensitive entity for the synthesis of complexes. This figure has been drawn on ChemDraw 21.0.0.

**Figure S2.** Basic schemes of photochemical synthesis. **A)** Excited photo-catalyst transfer electron to the substrate molecules. **B)** Excited photo-catalyst caused the transformation of an atom. **C)** Excited photo-catalyst Transfer energy to the substrate.

**Figure S3.** Fluorophore **a)** assembly of photoactive material via weak interactions. **b)** Photo-active materials on transition metal core. **c)** Photo-active material on stannoxane substrate photoactive material on the dendrimaric core.
